# Supplementary material
Source: PubMed Central journal article supplement (PMC9713462)
Supplement: iyac133_supplemental_table_1.pdf [file iyac133_supplemental_table_1.pdf]

| <b>Gene</b>  | <b>Transcript</b> | <b>Ensembl transcript ID</b> | <b>Transcript length</b> |
|--------------|-------------------|------------------------------|--------------------------|
| <i>hnf4a</i> | hnf4a-206         | ENSDART00000145426.3         | 3523bp                   |
| <i>hnf4a</i> | hnf4a-201         | ENSDART00000028236.7         | 3268bp                   |
| <i>hnf4g</i> | hnf4g-201         | ENSDART00000066644.8         | 1782bp                   |
| <i>hnf4g</i> | hnf4g-202         | ENSDART00000144193.3         | 1854bp                   |
| <i>hnf4g</i> | hnf4g-203         | ENSDART00000164750.3         | 3325bp                   |
| <i>hnf4b</i> | hnf4b-201         | ENSDART00000162891.2         | 1392bp                   |

**Supplemental Table 1. Transcript and protein information for *hnf4* genes.** Transcripts appear in the order in which they are depicted in Figure 1A. The Ensembl protein IDs which correspond to the protein models depicted in Figure 1B are bolded. Transcript and protein information was derived from Ensembl, zebrafish genome version GRCz11/danRer11.
