# Supplementary material
Source: PubMed Central journal article supplement (PMC9713462)
Supplement: iyac133_supplemental_table_2.pdf [file iyac133_supplemental_table_2.pdf]

|                              | Name              | Sequence                      | Reference            |
|------------------------------|-------------------|-------------------------------|----------------------|
| <b>Genotyping primers</b>    |                   |                               |                      |
|                              | hnf4a_Cris_checkF | TGATTCACACTACTTACTTGTCTAG     | Davison et al., 2017 |
|                              | hnf4a_Cris_checkR | GATTAAGTAGTTATCTCATCCTCAG     | Davison et al., 2017 |
|                              | hnf4g_Cris_checkR | GTAGACATGGCTCTTCCTGATA        | Davison et al., 2017 |
|                              | hnf4g_Cris_checkF | GAGTGTGTCTGTTGTTGTTGACAG      | Davison et al., 2017 |
|                              | hnf4b_sa21135_F   | CCATCTAAGATCCACTAATGCC        | This study           |
|                              | hnf4b_sa21135_R   | CCTGCATGTGTAGGCATGGTTCTTG     | This study           |
|                              | gfp_F             | GAAGAAGTCGTGCTGCTTCA          | This study           |
|                              | gfp_R             | CCTGAAGTTCATCTGCACCA          | This study           |
| <b>QPCR primers</b>          |                   |                               |                      |
|                              | 18S F             | CACTTGTCCCTCTAAGAAGTTGCA      | Davison et al., 2017 |
|                              | 18S R             | GGTTGATTCCGATAACGAACGA        | Davison et al., 2017 |
|                              | hnf4a2.1 F        | CAGTGTCCGTAAGTGCAGACTAAAG     | Davison et al., 2017 |
|                              | hnf4a2.1 R        | GTGAGCTCGCAGTAAAGCCACTG       | Davison et al., 2017 |
|                              | hnf4b1.1 F        | AGACCGAGCCACTGAAAAC           | Davison et al., 2017 |
|                              | hnf4b1.1 R        | CATGTGTAGGCATGGTTCTTG         | Davison et al., 2017 |
|                              | hnf4g2.1 F        | ATGAAGTTTTCTCCAACCTCTCC       | Davison et al., 2017 |
|                              | hnf4g2.1 R        | CTGCTGTGAAAGTGCTTCAGCGTA      | Davison et al., 2017 |
| <b>sequencing primers</b>    |                   |                               |                      |
|                              | hnf4gF_202        | CTCCAACCTCTCCCTAAATCC         | This study           |
|                              | hnf4gR_uni        | GTGAAAGTGCTTCAGCGTGAG         | This study           |
|                              | hnf4b_cDNAseq_fwd | ATGAAGATCTCTGGGTCGTC          | This study           |
|                              | hnf4b_cDNAseq_rev | TTAAAGGCACGTGTGGACG           | This study           |
| <b>Insitu probe primers</b>  |                   |                               |                      |
|                              | antiHnf4a_1F      | ATAATTCCTCGAAACTGCCCTG        | This study           |
|                              | antiHnf4a_1R      | atagcTAATACGACTCACTATAGGGT    | This study           |
|                              | senseHnf4a_1F     | atagcTAATACGACTCACTATAGGGA    | This study           |
|                              | senseHnf4a_1R     | TTTACTTAAAGCCGCCACACC         | This study           |
|                              | antiHnf4b_1F      | TTTAGGAGTGGCAGCAGCTTC         | This study           |
|                              | antiHnf4b_1R      | atagcTAATACGACTCACTATAGGGC    | This study           |
|                              | senseHnf4b_1F     | atagcTAATACGACTCACTATAGGGTTAG | This study           |
|                              | senseHnf4b_1R     | CAACCTTCCATGTCACCATCC         | This study           |
|                              | antiHnf4g_2F      | GTGTCATCCACCGAAACTGC          | This study           |
|                              | antiHnf4g_2R      | atagcTAATACGACTCACTATAGGGT    | This study           |
|                              | senseHnf4g_2F     | atagcTAATACGACTCACTATAGGGG    | This study           |
|                              | senseHnf4g_2R     | TCTAGGTTACCAGCATTGAGC         | This study           |
| <b>gRNA sequence primers</b> |                   |                               |                      |
|                              | hnf4g_gRNA F 1    | TAGGgtccccacagatcgcgagc       | This study           |
|                              | hnf4g_gRNA R 1    | AAACactgcgagatctgtggggac      | This study           |
|                              | hnf4g_gRNA F 4    | TAGGgtccaactgcgagatctgt       | This study           |
|                              | hnf4g_gRNA R 4    | AAACacagatcgcgagttggagc       | This study           |

**Supplemental Table 2. Primers and probe sequences.** List of primer sequences used for genotyping and generating CRISPR guide RNAs, generating *in situ* hybridization probes, and for QPCR.
